# Supplementary material for: Evidence-Based Practices for Acute Respiratory Failure and Acute Respiratory Distress Syndrome: A Systematic Review of Reviews
Source: PubMed Central journal article supplement — Chest. 2020 Jul 16;158(6):2381–93. doi: 10.1016/j.chest.2020.06.080 (PMC7768938; doi:10.1016/j.chest.2020.06.080), 2020-07-16
Supplement: mmc1.pdf [file mmc1.pdf]

# Evidence-Based Practices for Acute Respiratory Failure and Acute Respiratory Distress Syndrome

## A Systematic Review of Reviews

*Jennifer N. Ervin, PhD; Victor C. Rentes, MS; Emily R. Dibble, BA; Michael W. Sjoding, MD; Theodore J. Iwashyna, MD, PhD; Catherine L. Hough, MD; Michelle Ng Gong, MD; and Anne E. Sales, PhD*

CHEST 2020; 158(6):2381-2393

*Online supplements are not copyedited prior to posting and the author(s) take full responsibility for the accuracy of all data.*

© 2020 AMERICAN COLLEGE OF CHEST PHYSICIANS. Reproduction of this article is prohibited without written permission from the American College of Chest Physicians. See online for more details. DOI: 10.1016/j.chest.2020.06.080

**e-Appendix 1.**

Search strategy

Key words:(((("mechanical ventilation" or "mechanically ventilated" or "respiration, artificial"[mesh] or "artificial respiration"))AND ("acute respiratory failure" OR "acute respiratory distress syndrome")) AND (guideline OR consensus OR meta-analysisOR "systematic review"))

Observation: ("artificial respiration" was the controlled vocabulary suggested by PubMed).

Databases searched: Scopus, CINAHL, and PubMed.
